# Supplementary material for: The association between work situation and life satisfaction during the COVID-19 pandemic: prospective cohort study in Norway
Source: bioRxiv or medRxiv preprint supplement (doi:10.1101/2020.12.16.20248321), 2020-12-16
Supplement: Supplementary file [file media-1.pdf]

## ONLINE SUPPLEMENTARY MATERIAL

Supplementary Table 1. Logistic regression analyses of low life satisfaction stratified by survey round and education level. Adjusted analyses adjusted for: age, chronic conditions, base-level life satisfaction, and number of people they cohabit with.

|                             | Round 2 (spring)                              |                                             | Round 3 (spring)                              |                                             | Round 14/15 (autumn)                          |                                             |
|-----------------------------|-----------------------------------------------|---------------------------------------------|-----------------------------------------------|---------------------------------------------|-----------------------------------------------|---------------------------------------------|
|                             | OR low life satisfaction (95% CI), unadjusted | OR low life satisfaction (95% CI), adjusted | OR low life satisfaction (95% CI), unadjusted | OR low life satisfaction (95% CI), adjusted | OR low life satisfaction (95% CI), unadjusted | OR low life satisfaction (95% CI), adjusted |
| <b>≤ High school</b>        | n=39,566                                      |                                             | n=35,833                                      |                                             | n=22,558                                      |                                             |
| <b>Work situation</b>       |                                               |                                             |                                               |                                             |                                               |                                             |
| No/other change (reference) | 1 (Ref.)                                      | 1 (Ref.)                                    | 1 (Ref.)                                      | 1 (Ref.)                                    | 1 (Ref.)                                      | 1 (Ref.)                                    |
| Home-based office           | 1.0 (0.9, 1.1)                                | 1 (1.0, 1.1)                                | 0.9 (0.8, 1.0)                                | 0.9 (0.9, 1.0)                              | 1.1 (0.9, 1.3)                                | 1.1 (1, 1.3)                                |
| Lay-off                     | 1.4 (1.3, 1.6)                                | 1.5 (1.4, 1.6)                              | 1.5 (1.4, 1.7)                                | 1.6 (1.5, 1.8)                              | 2.7 (2.1, 3.3)                                | 3.0 (2.4, 3.7)                              |
| Loss of job                 | 2.8 (2.2, 3.5)                                | 2.9 (2.2, 3.7)                              | 3.3 (2.6, 4.3)                                | 3.4 (2.6, 4.5)                              | 4.5 (3.3, 6.2)                                | 4.3 (3.1, 5.9)                              |
| <b>College</b>              | n=63,736                                      |                                             | n=60,212                                      |                                             | n=53,207                                      |                                             |
| <b>Work situation</b>       |                                               |                                             |                                               |                                             |                                               |                                             |
| No/other change (reference) | 1 (Ref.)                                      | 1 (Ref.)                                    | 1 (Ref.)                                      | 1 (Ref.)                                    | 1 (Ref.)                                      | 1 (Ref.)                                    |
| Home-based office           | 1.0 (1.0, 1.1)                                | 1.0 (1.0, 1.1)                              | 1.0 (1.0, 1.1)                                | 1.0 (1.0, 1.1)                              | 1.2 (1.1, 1.3)                                | 1.2 (1.1, 1.3)                              |
| Lay-off                     | 1.8 (1.6, 1.9)                                | 1.8 (1.6, 1.9)                              | 1.8 (1.7, 2.0)                                | 1.9 (1.7, 2)                                | 2.7 (2.0, 3.4)                                | 2.9 (2.2, 3.8)                              |
| Loss of job                 | 2.4 (1.8, 3.1)                                | 2.3 (1.8, 3)                                | 3.6 (2.7, 4.7)                                | 3.4 (2.6, 4.5)                              | 4.4 (3.2, 5.9)                                | 4.1 (3.0, 5.6)                              |

Supplementary Table 2. Logistic regression analyses of low life satisfaction(score <6) in a subset with age<45 and educational level ≤high school stratified by survey round. Adjusted analyses adjusted for: chronic conditions, base-level life satisfaction, and number of people they cohabit with.

|                                              | Spring, round 2            |                          | Spring, round 3            |                          | Autumn, round 14/15        |                          |
|----------------------------------------------|----------------------------|--------------------------|----------------------------|--------------------------|----------------------------|--------------------------|
|                                              | OR (95% CI),<br>unadjusted | OR (95% CI),<br>adjusted | OR (95% CI),<br>unadjusted | OR (95% CI),<br>adjusted | OR (95% CI),<br>unadjusted | OR (95% CI),<br>adjusted |
| <b><u>Age &lt;45 , &lt;= High school</u></b> | n=17,301                   |                          | n=15,410                   |                          | n=8779                     |                          |
| <b>Work situation</b>                        |                            |                          |                            |                          |                            |                          |
| No/other change (reference)                  | 1 (Ref.)                   | 1 (Ref.)                 | 1 (Ref.)                   | 1 (Ref.)                 | 1 (Ref.)                   | 1 (Ref.)                 |
| Home-based office                            | 0.9 (0.8, 1.0)             | 1.0 (0.9, 1.1)           | 0.8 (0.7, 0.9)             | 0.8 (0.7, 1.0)           | 1.0 (0.8, 1.3)             | 1.0 (0.8, 1.3)           |
| Lay-off                                      | 1.3 (1.1, 1.4)             | 1.3 (1.2, 1.5)           | 1.4 (1.2, 1.6)             | 1.5 (1.3, 1.7)           | 2.1 (1.4, 3.1)             | 2.1 (1.4, 3.1)           |
| Loss of job                                  | 3.4 (2.3, 5.0)             | 3.6 (2.4, 5.3)           | 3.2 (2.1, 4.8)             | 3.3 (2.2, 5.0)           | 3.3 (1.8, 5.9)             | 2.9 (1.6, 5.3)           |
| <b><u>Age &lt;45 , College</u></b>           | n=22,364                   |                          | n=21,126                   |                          | n=14,600                   |                          |
| <b>Work situation</b>                        |                            |                          |                            |                          |                            |                          |
| No/other change (reference)                  | 1 (Ref.)                   | 1 (Ref.)                 | 1 (Ref.)                   | 1 (Ref.)                 | 1 (Ref.)                   | 1 (Ref.)                 |
| Home-based office                            | 1.0 (0.9, 1.1)             | 1.0 (0.9, 1.1)           | 1.0 (0.9, 1.1)             | 1.0 (0.9, 1.1)           | 1.1 (0.9, 1.3)             | 1.1 (0.9, 1.3)           |
| Lay-off                                      | 1.7 (1.5, 2.0)             | 1.7 (1.5, 2.0)           | 1.5 (1.2, 1.8)             | 1.5 (1.2, 1.8)           | 1.4 (0.7, 2.5)             | 1.3 (0.6, 2.4)           |
| Loss of job                                  | 2.6 (1.6, 4.2)             | 2.4 (1.5, 3.9)           | 4.6 (2.7, 7.4)             | 4.2 (2.5, 7.0)           | 5.5 (3.0, 9.7)             | 5.3 (2.9, 9.6)           |

Supplementary Table 3. Logistic regression analyses of low life satisfaction (score <6) stratified by survey round, gender, and age group. Adjusted analyses adjusted for: chronic conditions, base-level life satisfaction, and number of people they cohabit with.

|                                   | Spring, round 2            |                          | Spring, round 3            |                          | Autumn, round 14/15        |                          |
|-----------------------------------|----------------------------|--------------------------|----------------------------|--------------------------|----------------------------|--------------------------|
|                                   | OR (95% CI),<br>unadjusted | OR (95% CI),<br>adjusted | OR (95% CI),<br>unadjusted | OR (95% CI),<br>adjusted | OR (95% CI),<br>unadjusted | OR (95% CI),<br>adjusted |
| <b><u>Men, &lt;45 years</u></b>   | n=13,079                   |                          | n=11,701                   |                          | n=6827                     |                          |
| <b>Work situation</b>             |                            |                          |                            |                          |                            |                          |
| No/other change (reference)       | 1 (Ref.)                   | 1 (Ref.)                 | 1 (Ref.)                   | 1 (Ref.)                 | 1 (Ref.)                   | 1 (Ref.)                 |
| Home-based office                 | 1.0 (0.9, 1.1)             | 1.0 (0.9, 1.2)           | 1.1 (0.9, 1.2)             | 1.1 (1.0, 1.3)           | 1.1 (0.9, 1.3)             | 1.1 (0.9, 1.3)           |
| Lay-off                           | 2.1 (1.8, 2.4)             | 2.0 (1.7, 2.4)           | 2.2 (1.8, 2.6)             | 2.1 (1.8, 2.5)           | 3.2 (1.9, 5.2)             | 2.6 (1.5, 4.2)           |
| Loss of job                       | 5.0 (3.1, 8.1)             | 5.2 (3.2, 8.5)           | 5.3 (3.2, 8.5)             | 5.0 (3.0, 8.3)           | 4.4 (2.0, 9.0)             | 3.7 (1.6, 7.8)           |
| <b><u>Men, 45+ years</u></b>      | n=29,782                   |                          | n=27,401                   |                          | n=18,447                   |                          |
| <b>Work situation</b>             |                            |                          |                            |                          |                            |                          |
| No/other change (reference)       | 1 (Ref.)                   | 1 (Ref.)                 | 1 (Ref.)                   | 1 (Ref.)                 | 1 (Ref.)                   | 1 (Ref.)                 |
| Home-based office                 | 1.1 (1, 1.2)               | 1.2 (1.1, 1.3)           | 1.0 (0.9, 1.1)             | 1.1 (1.0, 1.2)           | 1.2 (1.1, 1.4)             | 1.3 (1.2, 1.5)           |
| Lay-off                           | 2.0 (1.8, 2.2)             | 2.0 (1.8, 2.2)           | 2.1 (1.9, 2.4)             | 2.2 (1.9, 2.4)           | 4.0 (3.1, 5.3)             | 4.5 (3.4, 6.0)           |
| Loss of job                       | 2.8 (2.0, 3.8)             | 2.5 (1.8, 3.5)           | 5.0 (3.6, 6.9)             | 4.6 (3.3, 6.4)           | 5.9 (4.1, 8.4)             | 5.3 (3.6, 7.7)           |
| <b><u>Women, &lt;45 years</u></b> | n=27,007                   |                          | n=25,194                   |                          | n=16,745                   |                          |
| <b>Work situation</b>             |                            |                          |                            |                          |                            |                          |
| No/other change (reference)       | 1 (Ref.)                   | 1 (Ref.)                 | 1 (Ref.)                   | 1 (Ref.)                 | 1 (Ref.)                   | 1 (Ref.)                 |
| Home-based office                 | 0.9 (0.8, 0.9)             | 0.9 (0.9, 1.0)           | 0.8 (0.8, 0.9)             | 0.9 (0.8, 1.0)           | 1.0 (0.8, 1.1)             | 1.0 (0.9, 1.2)           |
| Lay-off                           | 1.2 (1.1, 1.4)             | 1.2 (1.1, 1.4)           | 1.2 (1.1, 1.4)             | 1.3 (1.1, 1.5)           | 1.5 (1.0, 2.3)             | 1.5 (0.9, 2.2)           |
| Loss of job                       | 2.4 (1.6, 3.5)             | 2.2 (1.5, 3.3)           | 3.3 (2.2, 5.0)             | 3.2 (2.1, 4.8)           | 4.4 (2.7, 7.2)             | 4.0 (2.4, 6.6)           |
| <b><u>Women, 45+ years</u></b>    | n=34,866                   |                          | n=33,028                   |                          | n=25,048                   |                          |
| <b>Work situation</b>             |                            |                          |                            |                          |                            |                          |
| No/other change (reference)       | 1 (Ref.)                   | 1 (Ref.)                 | 1 (Ref.)                   | 1 (Ref.)                 | 1 (Ref.)                   | 1 (Ref.)                 |
| Home-based office                 | 0.9 (0.8, 0.9)             | 0.9 (0.9, 1.0)           | 1.0 (0.9, 1.1)             | 1.0 (1.0, 1.1)           | 1.1 (1.0, 1.2)             | 1.2 (1.0, 1.3)           |
| Lay-off                           | 1.2 (1.1, 1.4)             | 1.2 (1.1, 1.4)           | 1.6 (1.4, 1.8)             | 1.7 (1.5, 1.9)           | 2.8 (2.1, 3.6)             | 3.0 (2.3, 4.0)           |
| Loss of job                       | 2.4 (1.6, 3.5)             | 2.2 (1.5, 3.3)           | 2.6 (1.8, 3.5)             | 2.6 (1.8, 3.6)           | 3.8 (2.6, 5.5)             | 3.5 (2.4, 5.1)           |

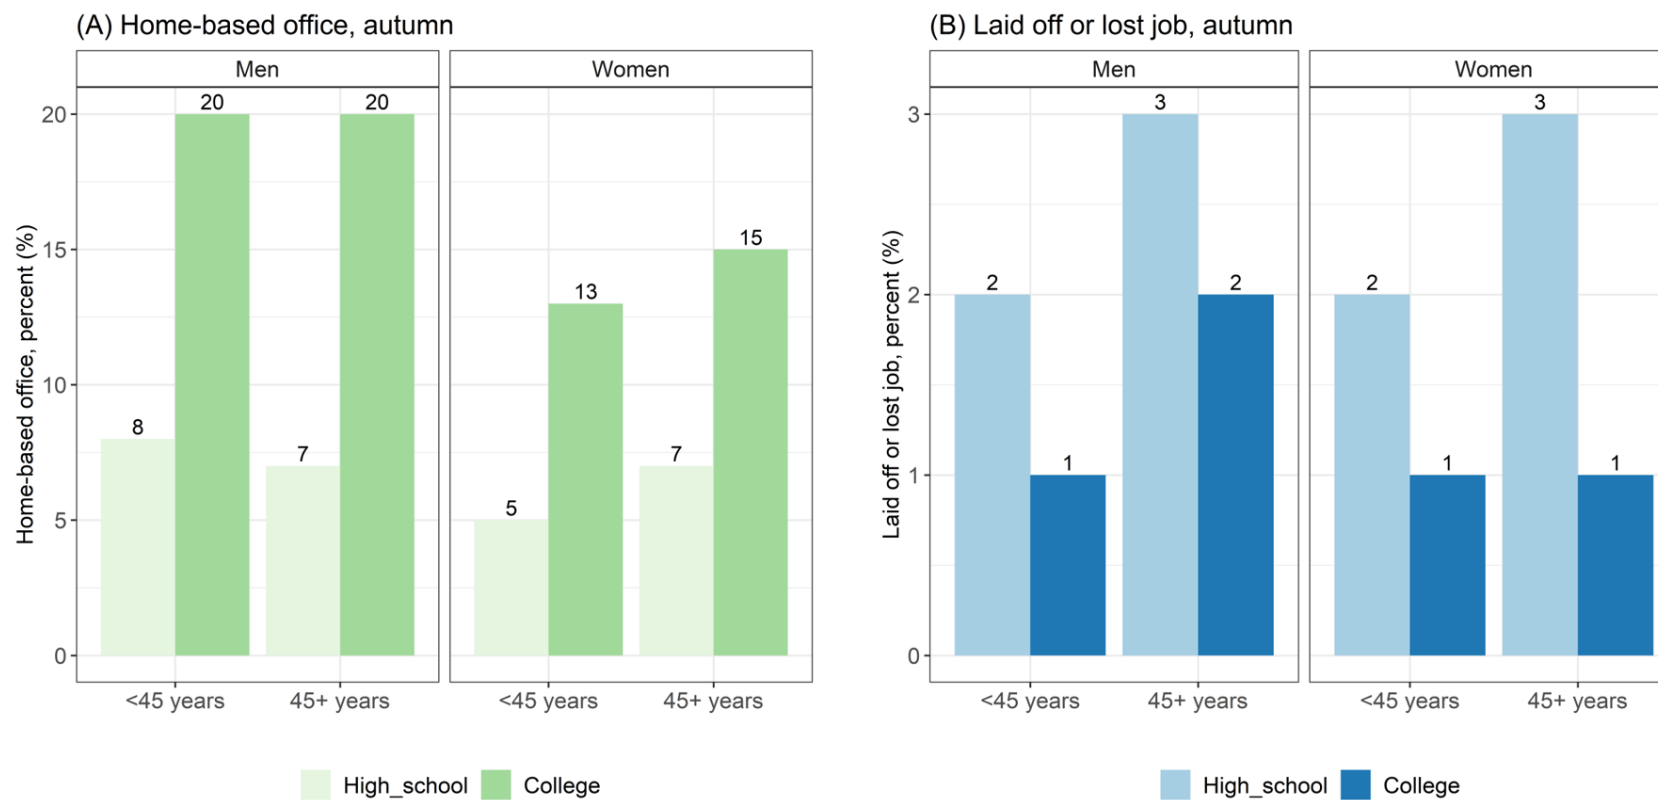

Supplementary Figure 1. Proportions with (A) home-based office and (B) who were laid off (temporary) or lost job (permanently) in autumn (survey round 15) across gender, age group and education level.
